# Supplementary material for: Supercritical hydrothermal synthesis of hydrophilic polymer-modified water-dispersible CeO2nanoparticles
Source: Royal Society of Chemistry journal article supplement (doi:10.1039/c0ce00467g), 2010-12-23
Supplement: c0ce00467g.pdf [file c0ce00467g.pdf]

**Electronic Supplementary Information Available for “Supercritical Hydrothermal Synthesis of Hydrophilic Polymer-Modified Water-Dispersible CeO<sub>2</sub> Nanoparticles”**

Minori Taguchi<sup>†\*</sup>, Seiichi Takami<sup>‡</sup>, Tadafumi Adschiri<sup>§</sup>, Takayuki Nakane<sup>†</sup>, Koichi Sato<sup>†</sup>  
and Takashi Naka<sup>†</sup>

<sup>†</sup>National Institute for Materials Science,

1-2-1 Sengen, Tsukuba 305-0047, Japan

<sup>‡</sup>Institute of Multidisciplinary Research for Advanced Materials, Tohoku University,

2-1-1 Katahira, Aoba-ku, Sendai 980-8577, Japan

<sup>§</sup>WPI, Advanced Institute for Materials Research, Tohoku University,

2-1-1 Katahira, Aoba-ku, Sendai 980-8577, Japan

## Supplementary Figures

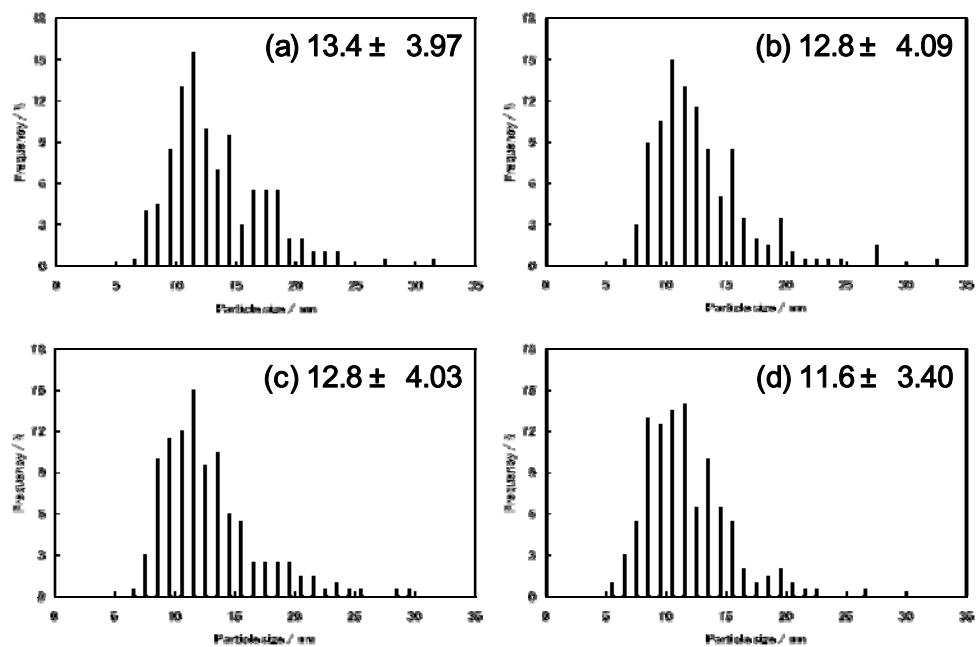

Figure S1. The arithmetic mean particle diameter and the size distributions from TEM images of prepared CeO<sub>2</sub> nanoparticles: (a) PVA500-modified, (b) PVA1000-modified, (c) PAA-modified, and (d) unmodified.

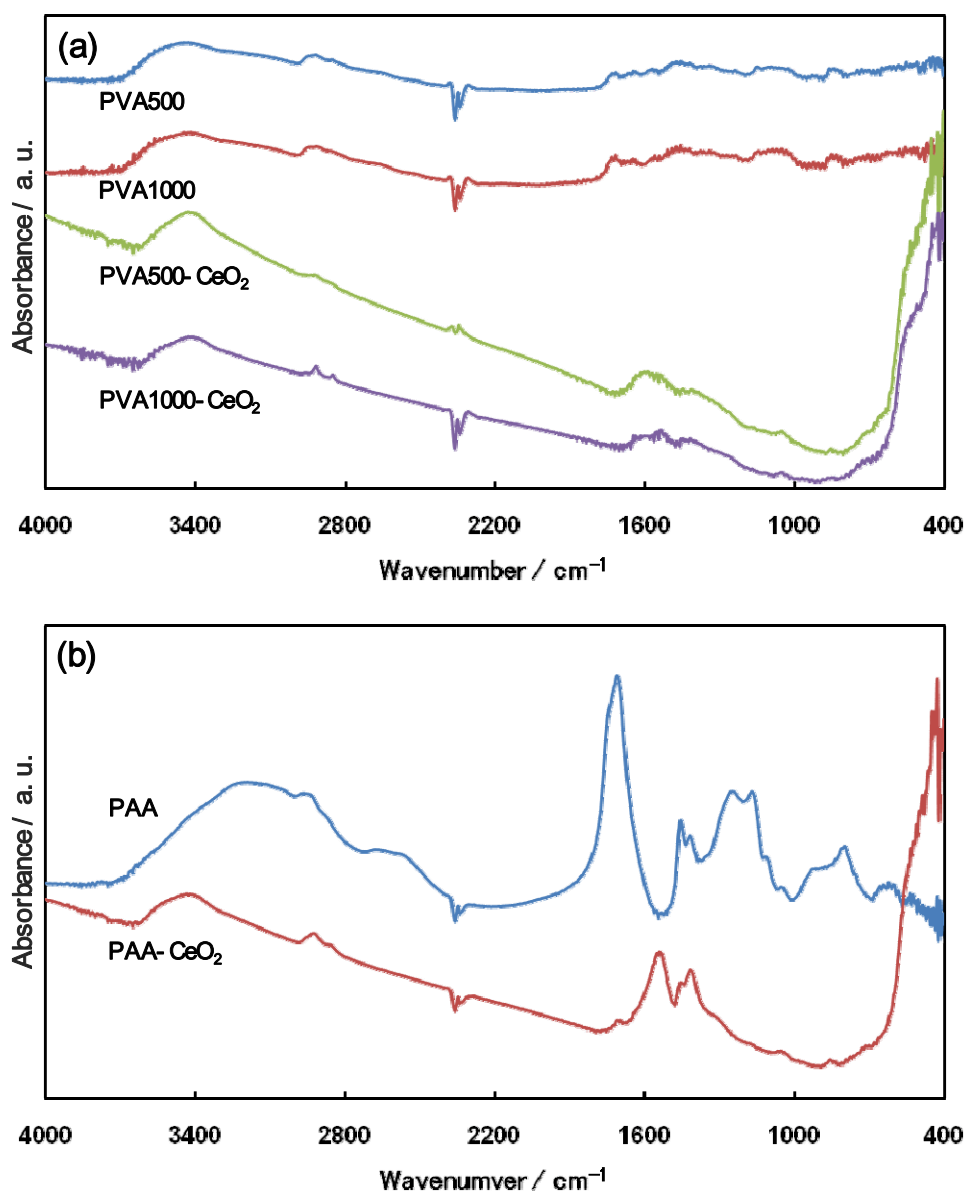

Figure S2. FT-IR spectra of original polymers and polymer-modified  $\text{CeO}_2$  nanoparticles: (a) blue line: PVA500, red line: PVA1000, green line: PVA500-modified  $\text{CeO}_2$  nanoparticles and purple line: PVA1000-modified  $\text{CeO}_2$  nanoparticles; (b) blue line: PAA, and red line: PAA-modified  $\text{CeO}_2$  nanoparticles.

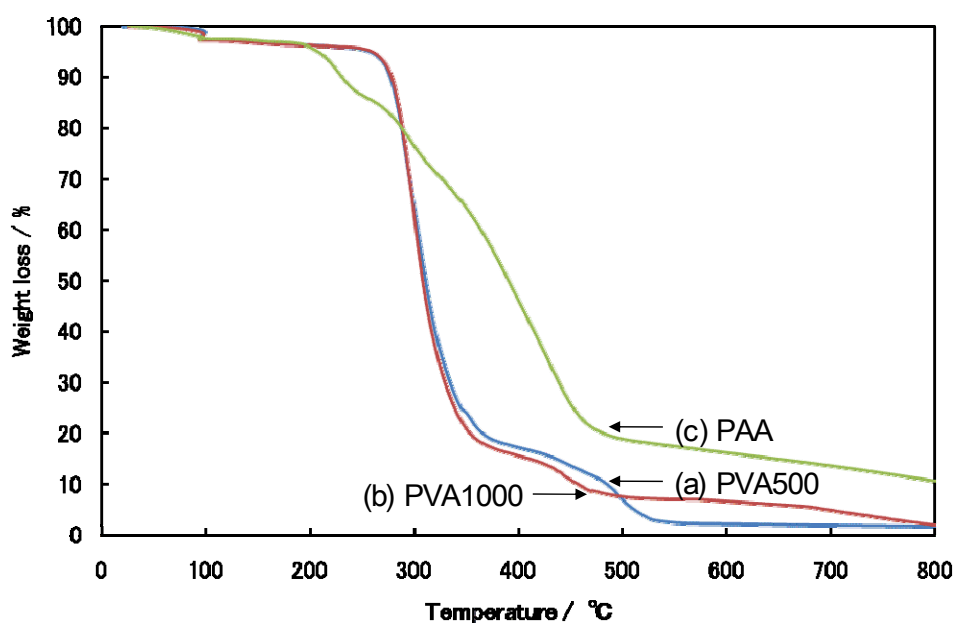

Figure S3. TGA curves of original polymers: (a) PVA500; (b) PVA1000; and (c) PAA. The measurements were conducted at a ramp rate of 10 °C/min under an argon atmosphere.

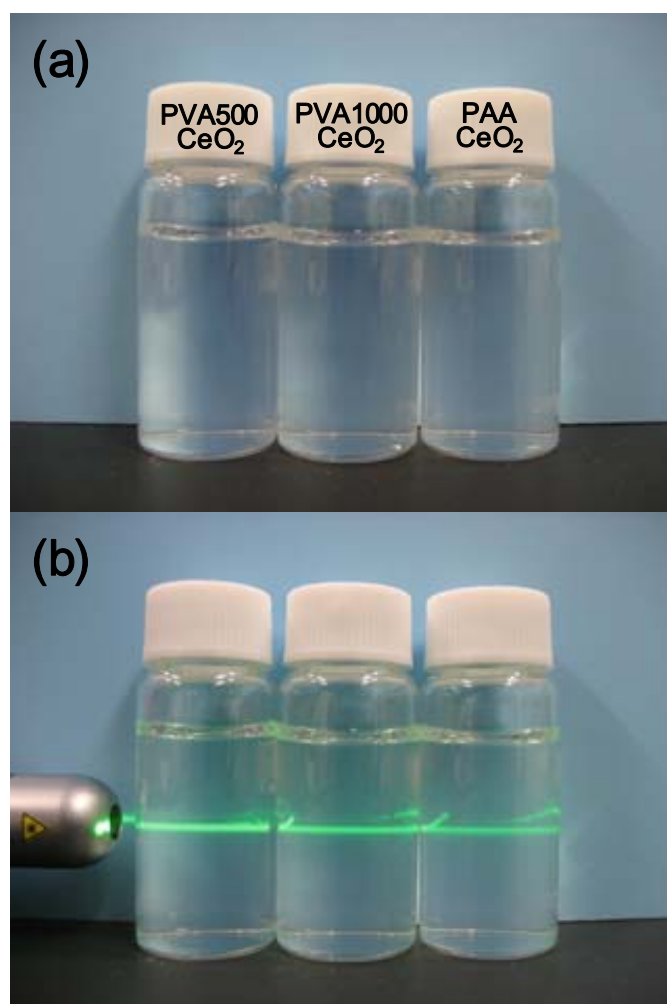

Figure S4. (a) Photographs showing polymer-modified CeO<sub>2</sub> nanoparticles in dispersed water. (b) Laser irradiated on the dispersed water to confirm the nanoparticles in water.
